# Supplementary material
Source: PubMed Central journal article supplement (PMC4469649)
Supplement: NIHMS688504-supplement-Suppl_FIg.pdf [file NIHMS688504-supplement-Suppl_FIg.pdf]

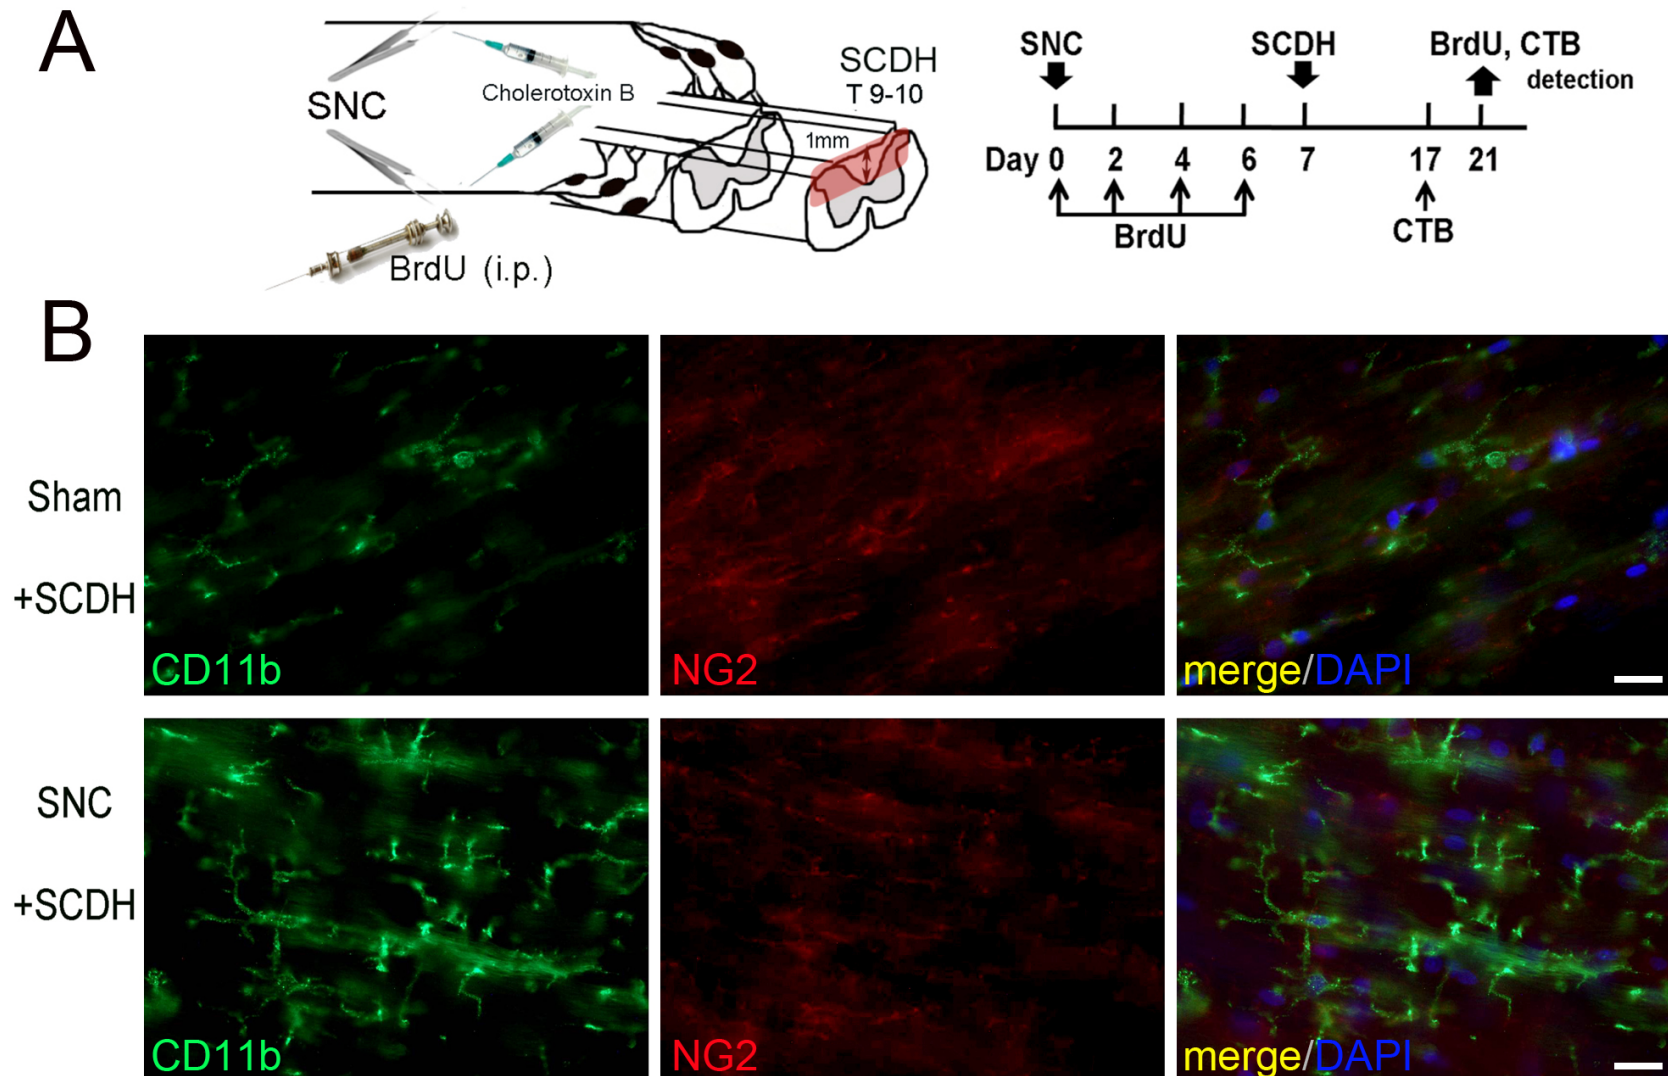

Supplementary Figure 1. Sustained microglial activation by conditioning lesion within the injured spinal cord. A: Experimental schedule and schematic diagram: BrdU (50 mg/kg/day, i.p.) or vehicle was injected at days 0, 2, 4 and 6 after bilateral SNC. T9-10 SCDH was performed at day 7 after SNC. Regenerating fibers were traced using bilateral intra-sciatic injection of CTB (1%) at day 17 after SNC. BrdU and CTB were detected at day 21 after SNC, corresponding to day 14 after SCDH. B, Dual-immunostaining for CD11b (green), NG2 (red) in spinal cord, following A. DAPI, blue. Micrographs representative of n=3/group. Scale bar, 25  $\mu$ m.
